# Supplementary material
Source: PubMed Central journal article supplement (PMC5456289)
Supplement: NIHMS858310-supplement-Supplement1.pdf [file NIHMS858310-supplement-Supplement1.pdf]

## Supplementary Appendix

This appendix has been provided by the authors to give readers additional information about their work.

Supplement to: Younge N, Goldstein RF, Bann CM, et al. Survival and neurodevelopmental outcomes among periviable infants. *N Engl J Med* 2017;376:617-28. DOI: [10.1056/NEJMoa1605566](https://doi.org/10.1056/NEJMoa1605566)

**Table of Contents:**

| <b>Content</b>                                                                                                  | <b>Pages</b> |
|-----------------------------------------------------------------------------------------------------------------|--------------|
| <b>Investigators</b>                                                                                            | 3-5          |
| <b>Table S1.</b> Comparison of the Bayley-2 and Bayley-3 Scales for Cognitive, Language, and Motor Development. | 6            |
| <b>References</b>                                                                                               | 7            |

## Investigators:

Participating NRN sites collected data and transmitted it to RTI International, the data coordinating center (DCC) for the network, which stored, managed and analyzed the data for this study. On behalf of the NRN, Drs. Abhik Das (DCC Principal Investigator) and Carla M. Bann (DCC Statistician) had full access to all of the data in the study, and with the NRN Center Principal Investigators, take responsibility for the integrity of the data and accuracy of the data analysis.

In addition to the authors, the following investigators and sites participated in the study: NRN Steering Committee Chairs: Alan H. Jobe, MD PhD, University of Cincinnati (2003-2006); Michael S. Caplan, MD, University of Chicago, Pritzker School of Medicine (2006-2011); Richard A. Polin, MD, Division of Neonatology, College of Physicians and Surgeons, Columbia University, (2011-present). Alpert Medical School of Brown University and Women & Infants Hospital of Rhode Island (U10 HD27904) – Abbot R. Lupton, MD; Martin Keszler, MD; William Oh, MD; Angelita M. Hensman, MS RNC-NIC; Barbara Alksninis, PNP; Kristin M. Basso, BSN MaT; Robert Burke, MD; Melinda Caskey, MD; Andrea Halbrook; Katharine Johnson, MD; Mary Lenore Keszler, MD; Theresa M. Leach, MEd CAES; Martha R. Leonard, BA BS; Lucy Noel; Bonnie E. Stephens, MD; Rachel A. Vogt, MD; Victoria E. Watson, MS CAS; Suzy Ventura; Yvette Yatchmink, MD. Case Western Reserve University, Rainbow Babies & Children's Hospital (U10 HD21364, M01 RR80) – Michele C. Walsh, MD MS; Avroy A. Fanaroff, MD; Deanne E. Wilson-Costello, MD; Nancy S. Newman, BA RN; Anna Marie Hibbs, MD; Monika Bhola, MD; Bonnie S. Siner, RN; Harriet G. Friedman, MA; Gulgun Yalcinkaya, MD. Children's Mercy Hospital (U10 HD68284) – William E. Truog, MD; Eugenia K. Pallotto, MD MSCE; Howard W. Kilbride MD; Cheri Gauldin, RN MSN CCRC; Anne Holmes RN MSN MBA-HCM CCRC; Kathy Johnson RN, CCRC. Cincinnati Children's Hospital Medical Center, University Hospital, and Good Samaritan Hospital (U10 HD27853, M01 RR8084) – Kurt Schibler, MD; Edward F. Donovan, MD; Cathy Grisby, BSN CCRC; Barbara Alexander, RN; Kate Bridges, MD; Estelle E. Fischer, MHSA MBA; Teresa L. Gratton, PA; Jody Hessling, RN; Lenora D. Jackson, CRC; Kristin Kirker, CRC; Holly L. Mincey, RN BSN; Greg Muthig, BS; Jean J. Steichen, MD; Marcia Worley Mersmann, RN; Kimberly Yolton, PhD. Duke University School of Medicine, University Hospital, Alamance Regional Medical Center, University of North Carolina, and Duke Regional Hospital (U10 HD40492, M01 RR30) – Joanne Finkle, RN JD; Patricia L. Ashley, MD PhD; William F. Malcolm, MD; Kathy J. Auten, MSHS; Kimberley A. Fisher, PhD FNP-BC IBCLC; Katherine A. Foy, RN; Sandra Grimes, RN BSN; Kathryn E. Gustafson, PhD; Melody B. Lohmeyer, RN MSN; Matthew M. Laughon, MD MPH; Carl L. Bose, MD; Janice Bernhardt, MS RN; Gennie Bose, RN; Janice K. Wereszczak, CPNP-AC/PC. Emory University, Children's Healthcare of Atlanta, Grady Memorial Hospital, and Emory University Hospital Midtown (U10 HD27851, M01 RR39) – Barbara J. Stoll, MD; David P. Carlton, MD; Ira Adams-Chapman, MD; Sheena Carter, PhD; Elisabeth Dinkins, PNP; Ellen C. Hale, RN BS CCRC; Yvonne C. Loggins, RN BSN; Sheena L. Carter, PhD; Maureen Mulligan LaRossa, RN; Gloria V. Smikle, PNP MSN. *Eunice Kennedy Shriver National Institute of Child Health and Human Development* – Linda L. Wright, MD; Elizabeth M. McClure, MEd; Stephanie Wilson Archer, MA. Indiana University, University Hospital, Methodist Hospital, Riley Hospital for Children, and Wishard Health Services (U10 HD27856, M01 RR750) – Brenda B. Poindexter, MD MS; Gregory M. Sokol, MD; James A. Lemons, MD; Lon G. Bohnke, MS; Ann B. Cook, MS; Anna M. Dusick, MD (deceased); Greg Eaken, PhD; Faithe Hamer, BS; Dianne E. Herron, RN; Abbey C. Hines, PsyD; Carolyn Lytle, MD MPH; Lucy C. Miller, RN BSN CCRC; Heike M. Minnich, PsyD HSPP; Lu-Ann Papile, MD; Leslie Richard, RN; Leslie Dawn Wilson, BSN CCRC. Nationwide Children's Hospital and the Ohio State University Medical Center (U10 HD68278) – Pablo J.

Sánchez, MD; Leif D. Nelin, MD; Sudarshan R. Jadcherla, MD; Patricia Luzader, RN; Christine A. Fortney, PhD RN; Gail E. Besner; Nehal A. Parikh, MD. RTI International (U10 HD36790) – Dennis Wallace, PhD; Marie G. Gantz, PhD; Margaret M. Crawford, BS CCRP; Betty K. Hastings; Elizabeth M. McClure, MEd; Jamie E. Newman, PhD MPH; Jeanette O'Donnell Auman, BS; Carolyn M. Petrie Huitema, MS CCRP; Kristin M. Zaterka-Baxter, RN BSN CCRP. Stanford University, California Pacific Medical Center, Dominican Hospital, El Camino Hospital, and Lucile Packard Children's Hospital (U10 HD27880, M01 RR70, UL1 TR93) – Krisa P. Van Meurs, MD; David K. Stevenson, MD; M. Bethany Ball, BS CCRC; Marian M. Adams, MD; Charles E. Ahlfors, MD; Joan M. Baran, PhD; Barbara Bentley, PhD; Lori E. Bond, PhD; Ginger K. Brudos, PhD; Elizabeth Bruno, PhD; Alexis S. Davis, MD MS; Maria Elena DeAnda, PhD; Anne M. DeBattista, RN PNP; Jan T. Epcar, MA; Barry E. Fleisher, MD; Lynne C. Huffman, MD; Magdy Ismael, MD MPH; Jean G. Kohn, MD MPH; Carol G. Kuelper, PhD; Julie C. Lee-Ancayas, PhD; Andrew W. Palmquist, RN; Melinda S. Proud, RCP; Renee P. Pyle, PhD; Dharshi Sivakumar, MD MRCP; Robert D. Stebbins, MD; Nicholas H. St. John, PhD; Brian Tang, MD; Hali E. Weiss, MD. Tufts Medical Center, Floating Hospital for Children (U10 HD53119, M01 RR54) – Ivan D. Frantz III, MD; John M. Fiascone, MD; Elisabeth C. McGowan, MD; Brenda L. MacKinnon, RNC; Ana K. Brussa, MS OTR/L; Anne Furey, MPH; Ellen Nylen, RN BSN; Cecelia E Sibley PT MHA. University of Alabama at Birmingham Health System and Children's Hospital of Alabama (U10 HD34216, M01 RR32) – Waldemar A. Carlo, MD; Namasivayam Ambalavanan, MD; Myriam Peralta-Carcelen, MD MPH; Kathleen G. Nelson, MD; Monica V. Collins, RN BSN MaEd; Shirley S. Cosby, RN BSN; Kirstin J. Bailey, PhD; Fred J. Biasini, PhD; Stephanie A. Chopko, PhD; Kristy Domnanovich, PhD; Kristen C. Johnston, MSN CRNP; Carin Kiser, MD; Sara Kryzwanski, MS; Mary Beth Moses, PT MS PCS; Cryshelle S. Patterson, PhD; Vivien A. Phillips, RN BSN; Julie Preskitt, MSOT MPH; Richard V. Rector, PhD; Leslie Rodrigues, PhD; Sarah Ryan, PhD; Leigh Ann Smith, CRNP; Amanda D. Soong, MD; Sally Whitley, MA OTR-L FAOTA. University of California - Los Angeles, Mattel Children's Hospital, Santa Monica Hospital, Los Robles Hospital and Medical Center, and Olive View Medical Center (U10 HD68270) – Uday Devaskar, MD; Meena Garg, MD; Isabell B. Purdy, PhD CPNP; Teresa Chanlaw, MPH; Rachel Geller, RN BSN. University of California – San Diego Medical Center and Sharp Mary Birch Hospital for Women and Newborns (U10 HD40461) – Neil N. Finer, MD; Yvonne E. Vaucher, MD MPH; David Kaegi, MD; Maynard R. Rasmussen MD; Paul R. Wozniak, MD; Kathy Arnell, RNC; Renee Bridge, RN; Clarence Demetrio, RN; Martha G. Fuller, RN MSN; Chris Henderson, RCP CRTT; Donna Posin, OTR/L MPA; Wade Rich, BSHS RRT; Radmila West PhD. University of Iowa and Mercy Medical Center (U10 HD53109, M01 RR59) – Tarah T. Colaizy, MD MPH; John A. Widness, MD; Dan L. Ellsbury, MD; Karen J. Johnson, RN BSN; Michael J. Acarregui, MD; Karen J. Johnson, RN BSN; Jane E. Brumbaugh, MD; Donia B. Campbell, RNC-NC; Diane L. Eastman, RN CPNP MA; Nancy J. Krutzfield, RN MA; Jacky R. Walker, RN. University of Miami, Holtz Children's Hospital (U10 HD21397, M01 RR16587) – Charles R. Bauer, MD; Shahnaz Duara, MD; Ruth Everett-Thomas, RN MSN; Amy Mur Worth, RN MS; Mary Allison, RN; Maria Calejo, MS; Alexis N. Diaz, BA; Kasey Hamlin-Smith, PhD; Lisa Jean-Gilles, BA; Maria Calejo, MS; Sylvia Fajardo-Hiriart, MD; Silvia M. Frade Eguaras, MA; Andrea Garcia, MS; Yamiley C. Gideon, BA; Michelle Harwood Berkowits, PhD; Elaine O. Mathews, RN; Helena Pierre, BA; Arielle Rigaud, MD; Alexandra Stoerger, BA. University of New Mexico Health Sciences Center (U10 HD27881, U10 HD53089, M01 RR997) – Kristi L. Watterberg, MD; Lu-Ann Papile, MD; Robin K. Ohls, MD; Conra Backstrom Lacy, RN; Janell F. Fuller, MD; Sandra Brown, BSN; Andrea Freeman Duncan, MD; Carol Hartenberger, BSN MPH; Jean R. Lowe, PhD; Rebecca A. Montman, BSN RNC. University of Pennsylvania, Hospital of the University of Pennsylvania, Pennsylvania Hospital, and Children's Hospital of Philadelphia (U10 HD68244) – Barbara Schmidt, MD MSc; Haresh Kirpalani, MB MSc; Sara B. DeMauro, MD MSCE; Aasma S. Chaudhary, BS RRT; Soraya Abbasi, MD; Toni Mancini, RN BSN CCRC; Dara M. Cucinotta, RN; Judy C. Bernbaum, MD; Marsha Gerdes, PhD; Hallam

Hurt, MD. University of Rochester Medical Center, Golisano Children's Hospital, the University of Buffalo Women's, and Children's Hospital of Buffalo (U10 HD68263, U10 HD40521, UL1 RR24160, M01 RR44, UL1 TR42) – Carl T. D'Angio, MD; Dale L. Phelps, MD; Ronnie Guillet, MD PhD; Gary J. Myers, MD; Linda J. Reubens, RN CCRC; Erica Burnell, RN; Diane Hust, MS RN CS; Julie Babish Johnson, MSW; Julianne Hunn, BS; Rosemary L. Jensen; Emily Kushner, MA; Deanna Maffett, RN; Joan Merzbach, LMSW; Mary Rowan, RN; Holly I.M. Wadkins; Kelley Yost, PhD; Lauren Zwetsch, RN MS PNP; Satyan Lakshminrusimha, MD; Anne Marie Reynolds, MD MPH; Farooq Osman, MD; Ashley Williams, MEd; Karen Wynn, RN. University of Tennessee Health Science Center (U10 HD21415) – Sheldon B. Korones, MD; Henrietta S. Bada, MD; Tina Hudson, RN BSN; Marilyn Williams, LCSW; Kimberly Yolton, PhD. University of Texas Health Science Center at Houston Medical School, Children's Memorial Hermann Hospital, and Lyndon Baines Johnson General Hospital/Harris County Hospital District (U10 HD21373) – Kathleen A. Kennedy, MD MPH; Jon E. Tyson, MD MPH; Georgia E. McDavid, RN; Esther G. Akpa, RN BSN; Nora I. Alaniz, BS; Pamela J. Bradt, MD MPH; Katrina Burson, RN BSN; Patty A. Cluff, RN; Susan Dieterich, PhD; Patricia W. Evans, MD; Beverly Foley Harris, RN BSN; Claudia I. Franco, RNC MSN; Charles Green, PhD; Margarita Jiminez, MD MPH; Anna E. Lis, RN BSN; Terri Major-Kincade, MD MPH; Sarah Martin, RN BSN; Brenda H. Morris, MD; M. Layne Poundstone, RN BSN; Stacey Reddoch, BA; Peggy Robichaux, RN BSN; Saba Siddiki, MD; Maegan C. Simmons, RN; Patti L. Pierce Tate, RCP; Laura L. Whitely MD; Sharon L. Wright, MT(ASCP). University of Texas Southwestern Medical Center at Dallas, Parkland Health & Hospital System, and Children's Medical Center Dallas (U10 HD40689, M01 RR633) – Pablo J. Sánchez, MD; Luc P. Brion, MD; Abbot R. Laptook, MD; Charles R. Rosenfeld, MD; Walid A. Salhab, MD; Roy J. Heyne, MD; R. Sue Broyles, MD; Diana M. Vasil, RNC-NIC; Sally S. Adams, MS RN CPNP; Lijun Chen, PhD RN; Cristin Dooley, PhD LSSP; Alicia Guzman; Gaynelle Hensley, RN; Elizabeth T. Heyne, MS MA PA-C PsyD; Jackie F. Hickman, RN; Melissa H. Leps, RN; Linda A. Madden, RN CPNP; Susie Madison, RN; Nancy A. Miller, RN; Janet S. Morgan, RN; Lizette E. Torres, RN; Catherine Twell Boatman, MS CIMI. University of Utah Medical Center, Intermountain Medical Center, LDS Hospital, and Primary Children's Medical Center (U10 HD53124, M01 RR64, UL1 TR105) – Roger G. Faix, MD; Bradley A. Yoder, MD; Anna Bodnar, MD; Karen A. Osborne, RN BSN CCRC; Shawna Baker, RN; Karie Bird, RN BSN; Jill Burnett, RNC BSN; Laura Cole, RN; Jennifer J. Jensen, RN BSN; Cynthia Spencer, RNC; Michael Steffen, MS CPM; Kimberlee Weaver-Lewis, RN BSN; Sarah Winter, MD; Karen Zanetti, RN. Wake Forest University, Baptist Medical Center, Forsyth Medical Center, and Brenner Children's Hospital (U10 HD40498, M01 RR7122) – T. Michael O'Shea, MD MPH; Robert G. Dillard, MD; Lisa K. Washburn, MD; Barbara G. Jackson, RN BSN; Nancy J. Peters, RN; Korinne Chiu, MA; Deborah Evans Allred, MA LPA; Donald J. Goldstein, PhD; Raquel Halfond, MA; Carroll Peterson, MA; Ellen L. Waldrep, MS; Cherrie D. Welch, MD MPH; Melissa Whalen Morris, MA; Gail Wiley Hounshell, PhD. Wayne State University, Hutzel Women's Hospital and Children's Hospital of Michigan (U10 HD21385) – Seetha Shankaran MD; Athina Pappas MD; John Barks, MD; Rebecca Bara, RN BSN; Angela Argento; PhD; Martha Carlson, MD; Mary Christensen, RT; Debra Driscoll, RN BSN; Laura A. Goldston, MA; Mary Johnson, RN BSN; Yvette R. Johnson, MD MPH; Deborah Kennedy, RN BSN; Geraldine Muran, RN BSN; Stephanie Wiggins, MS. Yale University, Yale-New Haven Children's Hospital, and Bridgeport Hospital (U10 HD27871, UL1 RR24139, M01 RR125, UL1 TR142) – Richard A. Ehrenkranz, MD; Harris Jacobs, MD; Christine G. Butler, MD; Nancy Close, PhD; Patricia Cervone, RN; Patricia Gettner, RN; Walter Gilliam, PhD; Sheila Greisman, RN; Monica Konstantino, RN BSN; JoAnn Poulsen, RN; Janet Taft, RN BSN; Joanne Williams, RN BSN; Elaine Romano, MSN.

**Table S1. Comparison of the Bayley-2 and Bayley-3 Scales for Cognitive, Language, and Motor Development.**<sup>1, 2</sup>

| <b>Developmental Component</b> | <b>Bayley-2 measure*</b>              | <b>Bayley-3 measure*</b>                                                               |
|--------------------------------|---------------------------------------|----------------------------------------------------------------------------------------|
| Cognitive                      | Mental Developmental Index (MDI)      | Cognitive Scale                                                                        |
| Language                       |                                       | Language Scale: Includes Expressive Communication and Receptive Communication subtests |
| Motor                          | Psychomotor Developmental Index (PDI) | Motor Scale: Includes Fine Motor and Gross Motor subtests                              |

\*The mean score for each Index or Scale is 100 with a standard deviation of 15.

## References

1. Bayley, N. Bayley Scales of Infant Development. Second Edition. San Antonio, Texas: The Psychological Corporation, 1993.
2. Bayley, N. Bayley Scales of Infant and Toddler Development. Third Edition. San Antonio, Texas: Harcourt Assessment, Inc., 2006.
